# Supplementary material for: Smoke-free legislation and the incidence of paediatric respiratory infections and wheezing/asthma: interrupted time series analyses in the four UK nations
Source: PubMed Central journal article supplement (PMC4604467; doi:10.1038/srep15246), 2015-10-14
Supplement: srep15246-s1.pdf [file srep15246-s1.pdf]

## Supplementary Information

Smoke-free legislation and the incidence of paediatric respiratory infections and wheezing/asthma: interrupted time series analyses in the four UK nations

Jasper V Been, Lisa Szatkowski, Tjeerd-Pieter van Staa, Hubert G Leufkens, Onno C van Schayck, Aziz Sheikh, Frank de Vries, Patrick Souverein

Contents:

Supplementary Figure S1. Number of GP practices contributing data to CPRD

Supplementary Table S1. Covariates included in models via backward selection process

Supplementary Methods. Original study protocol

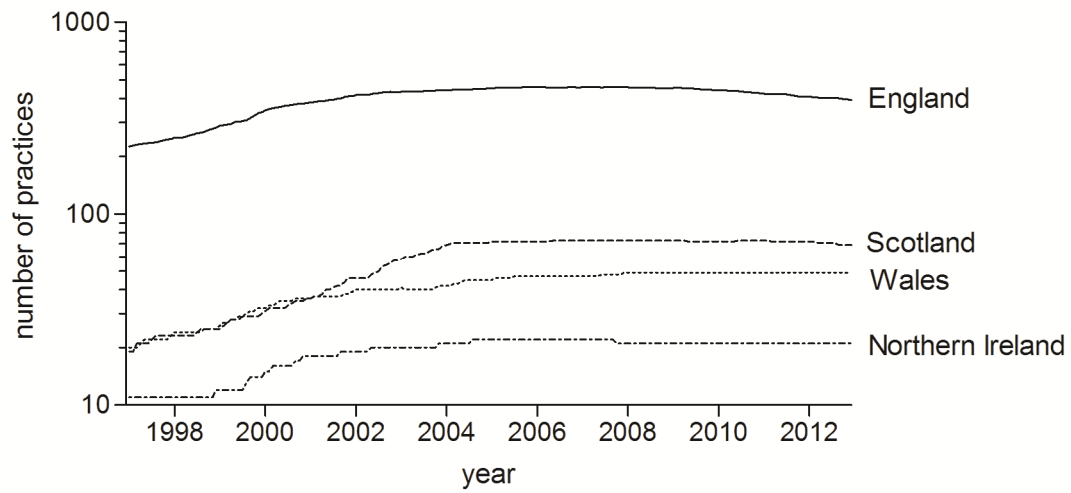

Supplementary Figure S1. Number of GP practices contributing data to CPRD. Note logarithmic scale on y-axis.

Supplementary Table S1: Covariates included in models via backward selection process

| Model                                        | Temperature | August holiday | April + December holidays | RTI consultation rate | Pandemic influenza | Autocorrelation term |
|----------------------------------------------|-------------|----------------|---------------------------|-----------------------|--------------------|----------------------|
| New asthma diagnoses                         |             |                |                           |                       |                    |                      |
| England (all ages)                           |             | x              | x                         | x                     |                    | MA(1)                |
| England (0-4 years)                          |             | x              | x                         | x                     |                    | MA(1)                |
| England (5-12 years)                         |             | x              | x                         | x                     |                    | MA(2)                |
| England (QOF sensitivity analysis; all ages) |             | x              | x                         | x                     |                    | MA(1)                |
| Scotland                                     |             |                |                           | x                     |                    | MA(1)                |
| Wales                                        |             | x              | x                         | x                     |                    | MA(1)                |
| Northern Ireland                             |             | x              | x                         | x                     |                    | MA(1)                |
| Respiratory tract infections                 |             |                |                           |                       |                    |                      |
| England (all ages)                           | x           | x              | x                         |                       | x                  | MA(1)                |
| England (0-4 years)                          | x           | x              | x                         |                       | x                  | MA(2)                |
| England (5-12 years)                         | x           | x              | x                         |                       | x                  | MA(1)                |
| Scotland                                     |             | x              | x                         |                       |                    | MA(1)                |
| Wales                                        |             | x              | x                         |                       |                    | MA(1)                |
| Northern Ireland                             |             | x              | x                         |                       |                    | MA(1)                |
| Upper respiratory tract infections           |             |                |                           |                       |                    |                      |
| England (all ages)                           | x           | x              | x                         |                       | x                  | MA(1)                |
| Lower respiratory tract infections           |             |                |                           |                       |                    |                      |
| England (all ages)                           |             | x              | x                         |                       | x                  | MA(1)                |

All models furthermore included a thin plate spline to account for the underlying time trend, a cubic spline to account for seasonality, terms to account for variations in the number of days in a month and the number of days GP practices were open (there was no strong correlation between these), and an offset variable to indicate the number of patients at risk. In the QOF sensitivity analysis the underlying time trend was non-linear. RTI = respiratory tract infection; MA=moving average; QOF=Quality and Outcomes Framework

Supplementary Methods:

ORIGINAL STUDY PROTOCOL

TITLE

Smoke-free legislation and childhood respiratory infections and asthma in primary care: an explorative study

AUTHORS

Jasper V. Been; Lisa Szatkowski; Tjeerd-Pieter van Staa, Patrick Souverein; Hubert G.M. Leufkens; Constant P. van Schayck; Aziz Sheikh; Frank de Vries

ABBREVIATIONS

CPRD Clinical Practice Research Datalink  
HES Hospital Episode Statistics  
ICD International Classification of Diseases  
IMD Index of Multiple Deprivation  
QOF Quality and Outcomes Framework  
SES socioeconomic status  
SHS second-hand smoke exposure  
WHO World Health Organization

LAY SUMMARY

Exposure to other people's tobacco smoke (second hand smoke; SHS) conveys an important health risk. Children are particularly vulnerable to adverse effects of SHS and are unable to influence their own degree of exposure. To protect people from SHS the World Health Organization (WHO) recommends implementation of smoke-free laws. Evidence is now emerging that smoke-free laws improve paediatric health, for example by decreasing hospital admissions for asthma. The effect of smoke-free legislation on the occurrence of asthma and respiratory infections among children that present to the GP has never been studied. We will study this effect of smoke-free across the UK, where smoke-free legislation was introduced at different time points in each of the four countries. Trends in the occurrence of asthma and respiratory infections will be investigated from 1997 to 2012 using data from the Clinical Practice Research Datalink (CPRD), which currently covers about 5-10% of GP practices in the UK. Effect of other factors that might influence trends in these diseases will be taken into account. To the best of our knowledge this is the first explorative study to assess the effect of smoke-free legislation on infant and child health in primary care and as such may help inform the development and implementation of additional measures to protect infants and children around the world from adverse effects of SHS.

## OBJECTIVE, SPECIFIC AIMS AND RATIONALE

We aim to describe the association between introduction of smoke-free legislation in different countries in the UK and incidence changes in asthma and respiratory tract infections (RTIs) in primary care among children aged 12 and younger.

## BACKGROUND

Tobacco use kills more than five million people annually making it the leading global cause of preventable death<sup>1</sup>. It is estimated that exposure to other people's tobacco smoke ("second-hand smoke" (SHS)) kills an additional 600,000 people worldwide each year, including 166,000 children under 15 years of age<sup>1, 2</sup>. Among non-smoking adults, SHS exposure also increases the risk of developing asthma, lung cancer and ischaemic heart disease<sup>2</sup>. In an attempt to reduce this substantial burden on passive smokers, the World Health Organization (WHO) has recommended that smoke-free indoor public environments are enforced through national legislation and that educational strategies are pursued in parallel to reduce SHS exposure in the home<sup>3</sup>. Studies have since shown that smoking bans effectively reduce SHS exposure, and through doing so reduce respiratory and sensory symptoms, sudden cardiac arrest, and admissions for acute myocardial infarction as well as associated mortality<sup>4-6</sup>.

As developing individuals, children are particularly vulnerable to the negative effects of SHS and they are unable to influence their own degree of exposure. Currently over 40% of children worldwide are regularly exposed to SHS<sup>1</sup>. SHS exposure both before and after birth increases the risk of adverse health outcomes in early life, and has been shown to increase the risk of stillbirth, preterm birth, low birth weight, and RTIs as well as asthma in childhood<sup>7-12</sup>. Children are thus particularly likely to benefit from smoke-free laws. Indeed, recent evaluations of the 2006 Scottish smoking ban showed reductions in preterm birth and low birth weight, as well as hospital admissions for asthma among children after its introduction<sup>13, 14</sup>. The latter finding has recently been confirmed in a similar study in England<sup>15</sup>.

### *Knowledge gap*

It is important that evaluations of smoke-free laws are reproduced in several countries where smoke-free laws were introduced at different time points given concerns that the evidence inevitably comes from quasi-experimental studies, which are inherently at high risk of bias<sup>16</sup>. Furthermore, an evaluation of child health effects of smoke-free legislation has hitherto been mainly based on the study of hospitalisations. We propose to build on this work by using data from the Clinical Practice Research Datalink (CPRD) database, which currently covers 5-10% of GP practices across the UK. This will provide an important community-based perspective to the current evidence base. From CPRD we will obtain disease trends for paediatric asthma and RTIs in primary care. Smoke-free laws were introduced at different time points in Scotland (March 26, 2006), Wales (April 2, 2007), Northern Ireland (April 30, 2007), and England (July 1, 2007), facilitating comparison of associated disease incidence trend changes among countries. As such the proposed study will serve to further inform the development and

implementation of global policy and strategies to further reduce SHS exposure in a particularly vulnerable population.

We hypothesise that introduction of smoke-free laws across the UK is associated with decreases in the incidence of asthma and RTIs in primary care among children aged 12 and younger.

## STUDY TYPE

Hypothesis generating / descriptive study

## STUDY DESIGN

Interrupted time series using generalised additive mixed models (GAMM)

## SAMPLE SIZE / POWER CALCULATION

Sample size calculation for time-oriented analyses is complicated given the complexity of the models. Formal power calculations are non-existent for GAMM models. A previous epidemiological evaluation of the 2007 English smoking ban among children <15 years of age showed a significant sudden drop in asthma hospitalisations of 9% (95% confidence interval (CI) 7-11%) and a subsequent annual drop of 3% (95% CI 2-4%) among children <15 years of age<sup>15</sup>. A similar evaluation of the 2006 Scottish smoking ban demonstrated an 18% (95% CI 15-22%) annual reduction in asthma hospitalisations among children <15 years of age<sup>13</sup>. To the best of our knowledge no prior studies have evaluated the effect of smoke-free legislation on paediatric RTIs. Meta-analyses of observational studies show that among children the association between second-hand smoke exposure and RTIs is of greater magnitude than that of smoke exposure and asthma<sup>2, 10-12</sup>. Any effect of smoke-free legislation on paediatric RTIs is therefore likely to be larger than that estimated for asthma. Considering the much higher incidences of asthma and RTIs in primary care as opposed to secondary care and the larger time span of our proposed study, we are confident that our study is adequately powered to detect statistically significant and clinically relevant drops in incidences of the proposed outcomes, even though CPRD holds primary health care data for 'only' 5-10% of the UK population.

## STUDY POPULATION

The study population will consist of all children aged 12 or younger registered with a CPRD practice for at least part of the study period (January 1<sup>st</sup> 1997 to December 31<sup>st</sup> 2012). The age cut-off is selected in an attempt to minimise the potential confounding effect of self-smoking.

## SELECTION OF COMPARISON GROUP(S) OR CONTROLS

An interrupted time series analysis does not employ a comparison or control group in the usual sense of this term. GAMM models will be used to model monthly counts of the number of children diagnosed with asthma or a RTI from January 1997 to December 2012 taking into account the number of children registered in CPRD during the month and who are thus 'at risk' of developing the outcome. An incidence rate ratio (IRR) with 95% CI will be calculated to quantify any change in the incidence of asthma and RTI in the months after the introduction of smoke-free legislation compared to the months beforehand. The model will account for any underlying long-term trend in asthma/RTI incidence (e.g. a long-term increase or decrease), as well as seasonal variations in the outcome.

## EXPOSURES, OUTCOMES AND COVARIATES

### Exposure

Every patient will be followed from the start of valid data collection or 1 January 1997, whichever comes latest, until the end of valid data collection, the end of the study period, or until 31 December of the year before the child becomes 13 years old. If the month of birth is available for a child, he/she will be followed until the latest day of the month before he/she becomes 13 years old. We have found however that month of birth is not available for about 58% of children in the database. For these children the date of first registration with a CPRD practice will be taken as a proxy for date of birth if they occur in the same year. If birth year precedes the year of registration, July 1 will be assigned as the birth month.

The exposure in this study is the intervention under investigation, namely exposure to a national smoking ban.

### Outcomes

#### 1. *Asthma*

Incident asthma diagnoses in primary care will be evaluated, using the following definition:

- recording of a medical code indicative of a wheezing disorder (Appendix 1)
- and/or the issue of a prescription of asthma-related medication (BNF chapters 3.1.1; 3.1.2; 3.1.4; 3.2; 3.3.1; 3.3.2; a detailed list is given in Appendix 2)
- and no prior recording of an asthma diagnosis or prescription of asthma-related medication (this includes the period preceding and containing the first day of valid (e.g. 'up to standard') data collection).

The earliest recording wheezing / asthma related medication defines the index date.

A new asthma diagnosis is thus made when any diagnostic code for asthma and/or any prescription of medication used for asthma are recorded for the first time in a particular patient. A full list of Read codes used for asthma diagnosis is provided in Appendix 1. A list of medications considered to be indicative of asthma for the purpose of this study can be provided upon request.

An inclusive definition of asthma is used for this study given the clinical heterogeneity of wheezing disorders in childhood and the inability to reliably distinguish between different wheezing phenotypes using routine health care data. Furthermore, most if not all wheezing phenotypes are expected to be affected by SHS exposure and are therefore potentially sensitive to an effect of smoke-free legislation.

## *2. Respiratory infection*

The primary outcome will be all acute RTIs in primary care, using the following definition:

- Primary outcome:
  - o recording of a medical code indicative of a RTI (Appendix III).
  - o and no recording of an RTI during the 14 days preceding the diagnosis

The primary outcome will involve all acute upper and lower RTIs. A full list of Read codes used for respiratory tract infection diagnoses is provided as Appendix 2. A respiratory infection is considered new when being registered at least 14 days after any prior respiratory infection in order to exclude repeated GP visits for the same RTI.

Secondary outcomes will be all acute upper RTIs and all acute lower RTIs using the following definitions:

- Secondary outcomes:
  - o Upper RTIs:
    - recording of a medical code indicative of an upper RTI (Appendix III)
    - and no recording of any RTI during the 14 days preceding the diagnosis
  - o Lower RTIs:
    - recording of a medical code indicative of a lower RTI (Appendix III).
    - and no recording of a lower RTI during the 14 days preceding the diagnosis

## Covariates

In GAMM modelling data are evaluated at aggregate level producing a rate ratio based on case counts. GAMM models therefore do not allow incorporation of individual-level covariates. Time series modelling is based on the assumption that the population structure does not change over time. Although this is expected to hold for most covariates, a change in age structure of the population over time may be expected given the increasing birth rate in the UK. Given the fact that both asthma and RTIs are more common among younger children, this may produce a spurious increasing trend in both outcomes over time. We will therefore perform a sensitivity analysis to assess the effects of the smoking ban among age subgroups, as discussed below.

National-level mean monthly temperature will furthermore be included as a predictor variable in each model, using data freely available from the UK Meteorological Office.



## DATA / STATISTICAL ANALYSIS PLAN

### *Production of incidence rates*

For every month, a denominator population will be defined. The denominator population consists of all patients aged 12 years and under who are enrolled on the 15<sup>th</sup> day of that month in CPRD practices that contribute up-to-standard data. For each month we will identify the number of children with each of our outcomes. We will calculate incidence rates and plot these over time in order to visualise obvious changes in temporal patterns.

### *Model description*

We will use GAMM to model monthly counts of the number of children with each outcome from January 1997 to December 2012 taking into account the number of children registered in CPRD during the month and who are thus 'at risk' of developing the outcome. An incidence rate ratio with 95% confidence interval will be calculated to quantify any change in the incidence of asthma and RTI in the months after the introduction of smoke-free legislation compared to the months beforehand. The model will account for any underlying long-term trend (linear or non-linear, as appropriate) in asthma/RTI incidence (e.g. a long-term increase or decrease), as well as seasonal variations in the outcome (using a cyclic cubic spline). Model residuals will be checked for any remaining autocorrelation, which will be accounted for using autoregressive and/or moving average terms if necessary. National-level mean monthly temperature will also be included as a predictor variable in each model. The primary analysis will be performed in England and will involve both primary and secondary outcomes. Secondary analyses will separately be performed in a similar manner - but for primary outcomes only - in Northern Ireland, Scotland, and Wales. All analyses will be performed using the R statistical software package.

### *Validity issues*

A number of potential threats to validity exist within this study. Given the multitude of primary and secondary analyses as well as potential validity threats, we will not perform separate sensitivity analyses to address these. Instead, these issues will be outlined and discussed in the report, with a scope of potentially addressing them in future work. The following potential validity threats are considered:

#### 1. Validity of recording

An important assumption of time series analysis is that the quality and degree of recording are constant over time. Quality criteria will be applied as discussed previously. A theoretical threat to the consistency of the degree of recording is the 1 April 2004 introduction of the Quality and Outcomes Framework (QOF) which provides GPs with an incentive to record asthma diagnoses (not RTIs). Recording changes are expected to produce sudden changes in incidence rates that cannot be explained by external factors. Such changes are typically not present in databases measuring the same outcome using a different method. We will perform a basic assessment of this issue by visually comparing incidence plots obtained in this study to incidence rates of hospitalisations for asthma (as derived from HES and published by Millett et al <sup>15</sup>), as well as RTIs (as derived from HES, unpublished data; ClinicalTrials.gov NCT01920165).

## 2. Data dependency

In contrast to the asthma outcome, RTI diagnoses are allowed to occur recurrently within the same individual. Such intra-individual RTIs will have a greater level of interdependency than inter-individual RTIs. As GAMM models work with stratum-specific counts, they cannot account for this data dependency. Previous similar studies using hospital department visits and hospitalisations as outcomes experienced the same validity threat, which was not specifically addressed in any of the studies as the consequential risk of bias was deemed to be low<sup>15, 17, 18</sup>.

## 3. Age

As mentioned previously, a change in age composition of the study cohort over time may result in spurious incidence changes of the outcomes of interest. As such changes occur gradually, this issue will in part be accounted for by accounting for underlying temporal trends in the models.

## 4. Pneumococcal vaccination

On September 4, 2006 the pneumococcal conjugate vaccine (PCV) was introduced into the UK childhood immunisations schedule at 2, 4, and 13 months of age. Children born from September 2004 were included in a catch-up programme. The relative contribution of true pneumococcal infections to the total burden of admissions for RTIs, the majority of which is likely to be of viral aetiology, is expected to be small. We assessed this issue in preliminary sensitivity analyses on childhood RTI admission data in England as obtained from HES, 2001-2012 (ClinicalTrials.gov NCT01920165). These demonstrate that estimation of the impact of smoke-free legislation was not influenced by accounting for PCV introduction. As the primary aim of PCV is reducing severe pneumococcal disease, which is likely to represent a very small proportion of all RTIs presenting to the GP, consequential bias of PCV introduction is likely to be negligible in the current study.

## 5. Asthma definition

The primary outcome definition may result in misclassification of prevalent asthma cases entering the database as 'new' (incident) cases upon their first recorded visit for asthma or first prescription after database entry. This has been shown to be a particular problem for subjects entering a practice that is already in the database (e.g. after the up-to-standard date for that practice<sup>19</sup>). As most children will enter a new practice by being born rather than moving house and the cohort is dynamic, with new patients entering the database continuously, potential consequential bias is expected to be small.

## 6. RTI definition

Using the primary definition, RTIs are considered incident when not preceded by another RTI in the 14 days preceding the event. This pragmatic cut-off may potentially introduce bias in two directions: 1. Mild upper RTIs may follow each other up at <14 day intervals, resulting in underestimation of the true incidence of 'new' RTIs; and 2. Chronic RTI disease episodes may extend beyond the 14-day period thus resulting in overestimation of the true incidence when the GP is visited for the same infection at a >14 day interval. This will however only introduce bias if the likelihood of any of these two situations occurring, changes over time. This is considered unlikely and the consequential bias is therefore expected to be low in this study.

## 7. Denominator definition

A very small proportion of patients will contribute to only part of the month, as they enter or leave the database during that month. In prior studies evaluating temporal smoking rate patterns, sensitivity analyses excluding such patients have shown negligible changes in outcome estimations.

## PATIENT / USER GROUP INVOLVEMENT

We will liaise with members of The Netherlands Asthma Foundation.

## LIMITATIONS OF THE STUDY DESIGN, DATA SOURCES AND ANALYTIC METHODS

The main limitation of this explorative study will be that a causal interpretation of the findings is not possible. For example, other policy changes may have taken place at the same time as the introduction of smoke-free legislation, which themselves may have led to changes in the outcomes of interest. However, interrupted time series analysis is among the strongest observational designs to infer possible causation where a randomised controlled trial is not ethical or feasible, as is the case with national smoke-free legislation. We will fully discuss the limitations of our analysis when preparing our work for publication. Other limitations have been discussed in the section “Validity issues” above.

## PLANS FOR DISSEMINATING AND COMMUNICATING STUDY RESULTS

We plan to present our findings at scientific meetings and publish the results in a peer-reviewed scientific journal.

## REFERENCES

1. WHO. WHO report on the global tobacco epidemic, 2009. Implementing smoke-free environments; 2009.
2. Oberg M, Jaakkola MS, Woodward A, Peruga A, Pruss-Ustun A. Worldwide burden of disease from exposure to second-hand smoke: a retrospective analysis of data from 192 countries. *Lancet*. 2011; 377(9760): 139-46.
3. WHO. Protection from exposure to second-hand smoke. Policy recommendations. 2007.
4. Callinan JE, Clarke A, Doherty K, Kelleher C. Legislative smoking bans for reducing secondhand smoke exposure, smoking prevalence and tobacco consumption. *Cochrane database of systematic reviews (Online)*. 2010; (4): CD005992.

5. de Korte-de Boer D, Kotz D, Viechtbauer W, van Haren E, Grommen D, de Munter M, et al. Effect of smoke-free legislation on the incidence of sudden circulatory arrest in the Netherlands. *Heart (British Cardiac Society)*. 2012; 98(13): 995-9.
6. Villalbi JR, Sanchez E, Benet J, Cabezas C, Castillo A, Guarga A, et al. The extension of smoke-free areas and acute myocardial infarction mortality: before and after study. *BMJ open*. 2011; 1(1): e000067.
7. Flenady V, Koopmans L, Middleton P, Froen JF, Smith GC, Gibbons K, et al. Major risk factors for stillbirth in high-income countries: a systematic review and meta-analysis. *Lancet*. 2011; 377(9774): 1331-40.
8. Leonardi-Bee J, Smyth A, Britton J, Coleman T. Environmental tobacco smoke and fetal health: systematic review and meta-analysis. *Archives of disease in childhood*. 2008; 93(5): F351-61.
9. Salmasi G, Grady R, Jones J, McDonald SD. Environmental tobacco smoke exposure and perinatal outcomes: a systematic review and meta-analyses. *Acta obstetrica et gynecologica Scandinavica*. 2010; 89(4): 423-41.
10. Jones LL, Hashim A, McKeever T, Cook DG, Britton J, Leonardi-Bee J. Parental and household smoking and the increased risk of bronchitis, bronchiolitis and other lower respiratory infections in infancy: systematic review and meta-analysis. *Respiratory research*. 2011; 12: 5.
11. Jones LL, Hassanien A, Cook DG, Britton J, Leonardi-Bee J. Parental smoking and the risk of middle ear disease in children: a systematic review and meta-analysis. *Archives of pediatrics & adolescent medicine*. 2012; 166(1): 18-27.
12. Burke H, Leonardi-Bee J, Hashim A, Pine-Abata H, Chen Y, Cook DG, et al. Prenatal and passive smoke exposure and incidence of asthma and wheeze: systematic review and meta-analysis. *Pediatrics*. 2012; 129(4): 735-44.
13. Mackay D, Haw S, Ayres JG, Fischbacher C, Pell JP. Smoke-free legislation and hospitalizations for childhood asthma. *The New England journal of medicine*. 2010; 363(12): 1139-45.
14. Mackay DF, Nelson SM, Haw SJ, Pell JP. Impact of Scotland's Smoke-Free Legislation on Pregnancy Complications: Retrospective Cohort Study. *PLoS medicine*. 2012; 9(3): e1001175.
15. Millett C, Lee JT, Lavery AA, Glantz SA, Majeed A. Hospital admissions for childhood asthma after smoke-free legislation in England. *Pediatrics*. 2013; 131(2): e495-501.
16. Freemantle N, Wood J, Crawford F. Evidence into practice, experimentation and quasi experimentation: are the methods up to the task? *Journal of epidemiology and community health*. 1998; 52(2): 75-81.
17. Mackay D, Haw S, Ayres JG, Fischbacher C, Pell JP. Smoke-free legislation and hospitalizations for childhood asthma. *N Engl J Med*. 2010; 363(12): 1139-45.

18. Rayens MK, Burkhart PV, Zhang M, Lee S, Moser DK, Mannino D, et al. Reduction in asthma-related emergency department visits after implementation of a smoke-free law. *J Allergy Clin Immunol*. 2008; 122(3): 537-41 e3.
19. Lewis JD, Bilker WB, Weinstein RB, Strom BL. The relationship between time since registration and measured incidence rates in the General Practice Research Database. *Pharmacoepidemiol Drug Saf*. 2005; 14(7): 443-51.

## Appendix 1: READ codes for asthma

|         |                                                           |
|---------|-----------------------------------------------------------|
| 663     | Asthma sometimes restricts exercise                       |
| 1737    | Wheezing                                                  |
| 1737.11 | Wheezing symptom                                          |
| 1780    | Aspirin induced asthma                                    |
| 1781    | Asthma trigger - pollen                                   |
| 1782    | Asthma trigger - tobacco smoke                            |
| 1783    | Asthma trigger - warm air                                 |
| 1784    | Asthma trigger - emotion                                  |
| 1785    | Asthma trigger - damp                                     |
| 1786    | Asthma trigger - animals                                  |
| 1787    | Asthma trigger - seasonal                                 |
| 1788    | Asthma trigger - cold air                                 |
| 1789    | Asthma trigger - respiratory infection                    |
| 2326    | O/E - expiratory wheeze                                   |
| 6635    | Increasing exercise wheeze                                |
| 8793    | Asthma control step 0                                     |
| 8794    | Asthma control step 1                                     |
| 8795    | Asthma control step 2                                     |
| 8796    | Asthma control step 3                                     |
| 8797    | Asthma control step 4                                     |
| 8798    | Asthma control step 5                                     |
| 663e100 | Asthma severely restricts exercise                        |
| 173A.00 | Exercise induced asthma                                   |
| 173B.00 | Nocturnal cough / wheeze                                  |
| 173e.00 | Viral wheeze                                              |
| 173e.11 | Viral induced wheeze                                      |
| 178..00 | Asthma trigger                                            |
| 178A.00 | Asthma trigger - airborne dust                            |
| 178B.00 | Asthma trigger - exercise                                 |
| 1J70.00 | Suspected asthma                                          |
| 1O2..00 | Asthma confirmed                                          |
| 23D2.11 | O/E - bronchospasm                                        |
| 663d.00 | Emergency asthma admission since last appointment         |
| 663e.00 | Asthma restricts exercise                                 |
| 663f.00 | Asthma never restricts exercise                           |
| 663J.00 | Airways obstruction reversible                            |
| 663j.00 | Asthma - currently active                                 |
| 663K.00 | Airways obstructn irreversible                            |
| 663m.00 | Asthma accident and emergency attendance since last visit |
| 663N.00 | Asthma disturbing sleep                                   |
| 663n.00 | Asthma treatment compliance satisfactory                  |
| 663N000 | Asthma causing night waking                               |
| 663N100 | Asthma disturbs sleep weekly                              |
| 663N200 | Asthma disturbs sleep frequently                          |
| 663O.00 | Asthma not disturbing sleep                               |
| 663O000 | Asthma never disturbs sleep                               |
| 663p.00 | Asthma treatment compliance unsatisfactory                |
| 663P.00 | Asthma limiting activities                                |
| 663P000 | Asthma limits activities 1 to 2 times per month           |

|         |                                                         |
|---------|---------------------------------------------------------|
| 663P100 | Asthma limits activities 1 to 2 times per week          |
| 663q.00 | Asthma daytime symptoms                                 |
| 663Q.00 | Asthma not limiting activities                          |
| 663r.00 | Asthma causes night symptoms 1 to 2 times per month     |
| 663s.00 | Asthma never causes daytime symptoms                    |
| 663t.00 | Asthma causes daytime symptoms 1 to 2 times per month   |
| 663u.00 | Asthma causes daytime symptoms 1 to 2 times per week    |
| 663v.00 | Asthma causes daytime symptoms most days                |
| 663V.00 | Asthma severity                                         |
| 663V000 | Occasional asthma                                       |
| 663V100 | Mild asthma                                             |
| 663V200 | Moderate asthma                                         |
| 663V300 | Severe asthma                                           |
| 663w.00 | Asthma limits walking up hills or stairs                |
| 663x.00 | Asthma limits walking on the flat                       |
| 663y.00 | Number of asthma exacerbations in past year             |
| 66Y9.00 | Step up change in asthma management plan                |
| 66YC.00 | Absent from work or school due to asthma                |
| 66YK.00 | Asthma follow-up                                        |
| 66YP.00 | Asthma night-time symptoms                              |
| 66Yq.00 | Asthma causes night time symptoms 1 to 2 times per week |
| 66Yr.00 | Asthma causes symptoms most nights                      |
| 8H2P.00 | Emergency admission, asthma                             |
| H060.11 | Acute wheezy bronchitis                                 |
| H30..12 | Recurrent wheezy bronchitis                             |
| H302.00 | Wheezy bronchitis                                       |
| H312000 | Chronic asthmatic bronchitis                            |
| H312011 | Chronic wheezy bronchitis                               |
| H33..00 | Asthma                                                  |
| H33..11 | Bronchial asthma                                        |
| H330.00 | Extrinsic (atopic) asthma                               |
| H330.11 | Allergic asthma                                         |
| H330.12 | Childhood asthma                                        |
| H330.13 | Hay fever with asthma                                   |
| H330.14 | Pollen asthma                                           |
| H330000 | Extrinsic asthma without status asthmaticus             |
| H330011 | Hay fever with asthma                                   |
| H330100 | Extrinsic asthma with status asthmaticus                |
| H330111 | Extrinsic asthma with asthma attack                     |
| H330z00 | Extrinsic asthma NOS                                    |
| H331.00 | Intrinsic asthma                                        |
| H331.11 | Late onset asthma                                       |
| H331000 | Intrinsic asthma without status asthmaticus             |
| H331100 | Intrinsic asthma with status asthmaticus                |
| H331111 | Intrinsic asthma with asthma attack                     |
| H331z00 | Intrinsic asthma NOS                                    |
| H332.00 | Mixed asthma                                            |
| H333.00 | Acute exacerbation of asthma                            |
| H334.00 | Brittle asthma                                          |
| H33z.00 | Asthma unspecified                                      |
| H33z.11 | Hyperreactive airways disease                           |

|         |                         |
|---------|-------------------------|
| H33z000 | Status asthmaticus NOS  |
| H33z011 | Severe asthma attack    |
| H33z100 | Asthma attack           |
| H33z111 | Asthma attack NOS       |
| H33z200 | Late-onset asthma       |
| H33zz00 | Asthma NOS              |
| H33zz11 | Exercise induced asthma |
| H33zz12 | Allergic asthma NEC     |
| H33zz13 | Allergic bronchitis NEC |
| H35y700 | Wood asthma             |
| H47y000 | Detergent asthma        |
| H5y1600 | Bronchospasm            |
| R060900 | [D]Wheezing             |
| R060E00 | [D]Mild wheeze          |
| R060F00 | [D]Moderate wheeze      |
| R060G00 | [D]Severe wheeze        |
| R060H00 | [D]Very severe wheeze   |



## Appendix 2: READ codes for respiratory infections

### *Acute upper respiratory tract infections*

|         |                                                     |
|---------|-----------------------------------------------------|
| 1656    | Feverish cold                                       |
| 7531100 | Drainage of peritonsillar abscess                   |
| 16L..00 | Influenza-like symptoms                             |
| 1C3..00 | Earache symptoms                                    |
| 1C32.00 | Unilateral earache                                  |
| 1C33.00 | Bilateral earache                                   |
| 1C3Z.00 | Earache symptom NOS                                 |
| 1C9..00 | Sore throat symptom                                 |
| 1C9..11 | Throat soreness                                     |
| 1C92.00 | Has a sore throat                                   |
| 1C93.00 | Persistent sore throat                              |
| 1C9Z.00 | Sore throat symptom NOS                             |
| 1CB3.00 | Throat pain                                         |
| 1CB3.11 | Pain in throat                                      |
| 2D95.00 | O/E - tympanic membrane red                         |
| 2DB6.00 | O/E - follicular tonsillitis                        |
| 2DB7.00 | O/E - exudate on tonsils                            |
| 2DC1.00 | O/E - pharynx hyperaemic                            |
| 2DC2.00 | O/E - granular pharyngitis                          |
| 2DC3.00 | Inflamed throat                                     |
| 4J3L.00 | Influenza A virus H1N1 subtype detected             |
| 4JF4000 | Throat swab culture positive                        |
| 4JU0.00 | Influenza H1 virus detected                         |
| 4JU1.00 | Influenza H2 virus detected                         |
| 4JU2.00 | Influenza H3 virus detected                         |
| 4JU3.00 | Influenza H5 virus detected                         |
| 4JU4.00 | Influenza A virus, other or untyped strain detected |
| 4JU5.00 | Influenza B virus detected                          |
| 4JUE.00 | Human rhinovirus detected                           |
| 4JUF.00 | Human parainfluenza virus detected                  |
| 65VA.00 | Notification of whooping cough                      |
| A32..00 | Diphtheria                                          |
| A320.00 | Faucial diphtheria                                  |
| A321.00 | Nasopharyngeal diphtheria                           |
| A322.00 | Anterior nasal diphtheria                           |
| A323.00 | Laryngeal diphtheria                                |
| A32y.00 | Other specified diphtheria                          |
| A32y000 | Conjunctival diphtheria                             |
| A32yz00 | Other specified diphtheria NOS                      |
| A32z.00 | Diphtheria NOS                                      |
| A33..00 | Whooping cough                                      |
| A33..11 | Bordetella                                          |
| A330.00 | Bordetella pertussis                                |
| A331.00 | Bordetella parapertussis                            |
| A33y.00 | Whooping cough - other specified organism           |
| A33yz00 | Other whooping cough NOS                            |
| A33z.00 | Whooping cough NOS                                  |
| A34..00 | Streptococcal sore throat and scarlatina            |

|         |                                                           |
|---------|-----------------------------------------------------------|
| A340.00 | Streptococcal sore throat                                 |
| A340000 | Streptococcal angina                                      |
| A340100 | Streptococcal laryngitis                                  |
| A340200 | Streptococcal pharyngitis                                 |
| A340300 | Streptococcal tonsillitis                                 |
| A340z00 | Streptococcal sore throat NOS                             |
| A34z.00 | Streptococcal sore throat with scarlatina NOS             |
| A552.00 | Postmeasles otitis media                                  |
| A793.00 | Rhinovirus                                                |
| Ayu3800 | [X]Diphtheria, unspecified                                |
| Ayu3A00 | [X]Whooping cough, unspecified                            |
| F51..00 | Nonsuppurative otitis media + eustachian tube disorders   |
| F510.00 | Acute non suppurative otitis media                        |
| F510000 | Acute otitis media with effusion                          |
| F510011 | Acute secretory otitis media                              |
| F510100 | Acute serous otitis media                                 |
| F510200 | Acute mucoid otitis media                                 |
| F510300 | Acute sanguinous otitis media                             |
| F510400 | Acute allergic serous otitis media                        |
| F510600 | Acute allergic sanguinous otitis media                    |
| F510z00 | Acute nonsuppurative otitis media NOS                     |
| F514.00 | Unspecified nonsuppurative otitis media                   |
| F514100 | Serous otitis media NOS                                   |
| F514200 | Catarrhal otitis media NOS                                |
| F514300 | Mucoid otitis media NOS                                   |
| F514z00 | Nonsuppurative otitis media NOS                           |
| F515.00 | Eustachian tube salpingitis                               |
| F515.11 | Catarrh - eustachian                                      |
| F515000 | Unspecified eustachian tube salpingitis                   |
| F515100 | Acute eustachian tube salpingitis                         |
| F515z00 | Eustachian tube salpingitis NOS                           |
| F52..00 | Suppurative and unspecified otitis media                  |
| F520.00 | Acute suppurative otitis media                            |
| F520000 | Acute suppurative otitis media tympanic membrane intact   |
| F520100 | Acute suppurative otitis media tympanic membrane ruptured |
| F520300 | Acute suppurative otitis media due to disease EC          |
| F520z00 | Acute suppurative otitis media NOS                        |
| F524.00 | Purulent otitis media NOS                                 |
| F524000 | Bilateral suppurative otitis media                        |
| F525.00 | Recurrent acute otitis media                              |
| F526.00 | Acute left otitis media                                   |
| F527.00 | Acute right otitis media                                  |
| F528.00 | Acute bilateral otitis media                              |
| F52z.00 | Otitis media NOS                                          |
| F52z.11 | Infection ear                                             |
| F53..00 | Mastoiditis and related conditions                        |
| F530.00 | Acute mastoiditis                                         |
| F530.11 | Abscess of mastoid                                        |
| F530.12 | Empyema of mastoid                                        |
| F530000 | Acute mastoiditis without complications                   |
| F530100 | Subperiosteal mastoid abscess                             |

|         |                                                            |
|---------|------------------------------------------------------------|
| F530200 | Gradenigo's syndrome                                       |
| F530300 | Acute mastoiditis with other complication                  |
| F530z00 | Acute mastoiditis NOS                                      |
| F53z.00 | Mastoiditis NOS                                            |
| F540.00 | Acute myringitis without otitis media                      |
| F540100 | Unspecified acute tympanitis                               |
| F540z00 | Acute myringitis NOS                                       |
| F587.00 | Otalgia                                                    |
| F587000 | Unspecified otalgia                                        |
| F587100 | Otogenic pain                                              |
| F587z00 | Otalgia NOS                                                |
| FyuP000 | [X]Other acute nonsuppurative otitis media                 |
| FyuP300 | [X]Otitis media in bacterial diseases classified elsewhere |
| FyuP400 | [X]Otitis media in viral diseases classified elsewhere     |
| FyuP500 | [X]Otitis media in other diseases classified elsewhere     |
| FyuP700 | [X]Other mastoiditis and related conditions                |
| H00..00 | Acute nasopharyngitis                                      |
| H00..11 | Common cold                                                |
| H00..12 | Coryza - acute                                             |
| H00..13 | Febrile cold                                               |
| H00..14 | Nasal catarrh - acute                                      |
| H00..15 | Pyrexial cold                                              |
| H00..16 | Rhinitis - acute                                           |
| H01..00 | Acute sinusitis                                            |
| H01..11 | Sinusitis                                                  |
| H010.00 | Acute maxillary sinusitis                                  |
| H010.11 | Antritis - acute                                           |
| H011.00 | Acute frontal sinusitis                                    |
| H012.00 | Acute ethmoidal sinusitis                                  |
| H013.00 | Acute sphenoidal sinusitis                                 |
| H014.00 | Acute rhinosinusitis                                       |
| H01y.00 | Other acute sinusitis                                      |
| H01y000 | Acute pansinusitis                                         |
| H01yz00 | Other acute sinusitis NOS                                  |
| H01z.00 | Acute sinusitis NOS                                        |
| H02..00 | Acute pharyngitis                                          |
| H02..11 | Sore throat NOS                                            |
| H02..12 | Viral sore throat NOS                                      |
| H02..13 | Throat infection - pharyngitis                             |
| H020.00 | Acute gangrenous pharyngitis                               |
| H021.00 | Acute phlegmonous pharyngitis                              |
| H022.00 | Acute ulcerative pharyngitis                               |
| H023.00 | Acute bacterial pharyngitis                                |
| H023000 | Acute pneumococcal pharyngitis                             |
| H023100 | Acute staphylococcal pharyngitis                           |
| H023z00 | Acute bacterial pharyngitis NOS                            |
| H024.00 | Acute viral pharyngitis                                    |
| H02z.00 | Acute pharyngitis NOS                                      |
| H03..00 | Acute tonsillitis                                          |
| H03..11 | Throat infection - tonsillitis                             |
| H03..12 | Tonsillitis                                                |

|         |                                                      |
|---------|------------------------------------------------------|
| H030.00 | Acute erythematous tonsillitis                       |
| H031.00 | Acute follicular tonsillitis                         |
| H032.00 | Acute ulcerative tonsillitis                         |
| H033.00 | Acute catarrhal tonsillitis                          |
| H034.00 | Acute gangrenous tonsillitis                         |
| H035.00 | Acute bacterial tonsillitis                          |
| H035000 | Acute pneumococcal tonsillitis                       |
| H035100 | Acute staphylococcal tonsillitis                     |
| H035z00 | Acute bacterial tonsillitis NOS                      |
| H036.00 | Acute viral tonsillitis                              |
| H037.00 | Recurrent acute tonsillitis                          |
| H03z.00 | Acute tonsillitis NOS                                |
| H04..00 | Acute laryngitis and tracheitis                      |
| H040.00 | Acute laryngitis                                     |
| H040000 | Acute oedematous laryngitis                          |
| H040100 | Acute ulcerative laryngitis                          |
| H040200 | Acute catarrhal laryngitis                           |
| H040300 | Acute phlegmonous laryngitis                         |
| H040400 | Acute haemophilus influenzae laryngitis              |
| H040600 | Acute suppurative laryngitis                         |
| H040w00 | Acute viral laryngitis unspecified                   |
| H040x00 | Acute bacterial laryngitis unspecified               |
| H040z00 | Acute laryngitis NOS                                 |
| H041.00 | Acute tracheitis                                     |
| H041000 | Acute tracheitis without obstruction                 |
| H041100 | Acute tracheitis with obstruction                    |
| H041z00 | Acute tracheitis NOS                                 |
| H042.00 | Acute laryngotracheitis                              |
| H042.11 | Laryngotracheitis                                    |
| H042000 | Acute laryngotracheitis without obstruction          |
| H042100 | Acute laryngotracheitis with obstruction             |
| H042z00 | Acute laryngotracheitis NOS                          |
| H043.00 | Acute epiglottitis (non strep)                       |
| H043.11 | Viral epiglottitis                                   |
| H043000 | Acute epiglottitis without obstruction               |
| H043100 | Acute epiglottitis with obstruction                  |
| H043200 | Acute obstructive laryngitis                         |
| H043211 | Croup                                                |
| H043z00 | Acute epiglottitis NOS                               |
| H044.00 | Croup                                                |
| H04z.00 | Acute laryngitis and tracheitis NOS                  |
| H05..00 | Other acute upper respiratory infections             |
| H050.00 | Acute laryngopharyngitis                             |
| H051.00 | Acute upper respiratory tract infection              |
| H052.00 | Pharyngotracheitis                                   |
| H053.00 | Tracheopharyngitis                                   |
| H054.00 | Recurrent upper respiratory tract infection          |
| H055.00 | Pharyngolaryngitis                                   |
| H05y.00 | Other upper respiratory infections of multiple sites |
| H05z.00 | Upper respiratory infection NOS                      |
| H05z.11 | Upper respiratory tract infection NOS                |

|         |                                                              |
|---------|--------------------------------------------------------------|
| H05z.12 | Viral upper respiratory tract infection NOS                  |
| H120111 | Catarrhal child                                              |
| H121100 | Atrophic pharyngitis                                         |
| H121200 | Granular pharyngitis                                         |
| H121300 | Hypertrophic pharyngitis                                     |
| H130.12 | Maxillary sinusitis                                          |
| H131.11 | Frontal sinusitis                                            |
| H135.00 | Recurrent sinusitis                                          |
| H13y100 | Pansinusitis                                                 |
| H141.00 | Tonsil and/or adenoid hypertrophy                            |
| H15..00 | Peritonsillar abscess - quinsy                               |
| H15..11 | Quinsy                                                       |
| H1y1z14 | Nasal infection                                              |
| H1y2200 | Parapharyngeal abscess                                       |
| H1y2300 | Retropharyngeal abscess                                      |
| H1y2600 | Pharynx or nasopharynx abscess                               |
| H27..00 | Influenza                                                    |
| H271000 | Influenza with laryngitis                                    |
| H271100 | Influenza with pharyngitis                                   |
| H27z.00 | Influenza NOS                                                |
| H27z.11 | Flu like illness                                             |
| H27z.12 | Influenza like illness                                       |
| H29..00 | Avian influenza                                              |
| H2A..00 | Influenza due to Influenza A virus subtype H1N1              |
| H2A..11 | Influenza A (H1N1) swine flu                                 |
| Hyu0.00 | [X]Acute upper respiratory infections                        |
| Hyu0000 | [X]Other acute sinusitis                                     |
| Hyu0100 | [X]Acute pharyngitis due to other specified organisms        |
| Hyu0200 | [X]Acute tonsillitis due to other specified organisms        |
| Hyu0400 | [X]Flu+oth respiratory manifestations,'flu virus identified  |
| Hyu0500 | [X]Influenza+other manifestations,influenza virus identified |
| Hyu0600 | [X]Influenza+oth respiratory manifestatns,virus not identifd |
| Hyu0700 | [X]Influenza+other manifestations, virus not identified      |
| R041.00 | [D]Throat pain                                               |
| R153200 | [D]Positive culture findings in throat                       |

*Acute lower respiratory tract infections*

|         |                                                     |
|---------|-----------------------------------------------------|
| 1825    | Pleuritic pain                                      |
| 1827    | Painful breathing -pleurodynia                      |
| 1827.11 | Pleurodynia                                         |
| 23D5.00 | O/E - pleural friction rub                          |
| 23D5.11 | O/E - pleural rub                                   |
| 4JU9.00 | Respiratory syncytial virus A detected              |
| 4JUA.00 | Respiratory syncytial virus B detected              |
| 4JUB.00 | Respiratory syncytial virus untyped strain detected |
| 4JUK.00 | Mycoplasma pneumoniae detected                      |
| A022200 | Salmonella pneumonia                                |
| A521.00 | Varicella pneumonitis                               |
| A54x400 | Herpes simplex pneumonia                            |
| A551.00 | Postmeasles pneumonia                               |

|         |                                                              |
|---------|--------------------------------------------------------------|
| A730.00 | Ornithosis with pneumonia                                    |
| A741.00 | Epidemic pleurodynia                                         |
| A785000 | Cytomegaloviral pneumonitis                                  |
| A79A.00 | Respiratory syncytial virus infection                        |
| A7y0200 | Resp syncytial virus as cause of dis class to other chapters |
| AyuKN00 | [X]Resp syncytial virus/cause/diseases classfd/oth chapters  |
| H06..00 | Acute bronchitis and bronchiolitis                           |
| H060.00 | Acute bronchitis                                             |
| H060.11 | Acute wheezy bronchitis                                      |
| H060000 | Acute fibrinous bronchitis                                   |
| H060100 | Acute membranous bronchitis                                  |
| H060200 | Acute pseudomembranous bronchitis                            |
| H060300 | Acute purulent bronchitis                                    |
| H060400 | Acute croupous bronchitis                                    |
| H060500 | Acute tracheobronchitis                                      |
| H060600 | Acute pneumococcal bronchitis                                |
| H060700 | Acute streptococcal bronchitis                               |
| H060800 | Acute haemophilus influenzae bronchitis                      |
| H060900 | Acute neisseria catarrhalis bronchitis                       |
| H060A00 | Acute bronchitis due to mycoplasma pneumoniae                |
| H060B00 | Acute bronchitis due to coxsackievirus                       |
| H060C00 | Acute bronchitis due to parainfluenza virus                  |
| H060D00 | Acute bronchitis due to respiratory syncytial virus          |
| H060E00 | Acute bronchitis due to rhinovirus                           |
| H060F00 | Acute bronchitis due to echovirus                            |
| H060v00 | Subacute bronchitis unspecified                              |
| H060w00 | Acute viral bronchitis unspecified                           |
| H060x00 | Acute bacterial bronchitis unspecified                       |
| H060z00 | Acute bronchitis NOS                                         |
| H061.00 | Acute bronchiolitis                                          |
| H061000 | Acute capillary bronchiolitis                                |
| H061100 | Acute obliterating bronchiolitis                             |
| H061200 | Acute bronchiolitis with bronchospasm                        |
| H061300 | Acute exudative bronchiolitis                                |
| H061400 | Obliterating fibrous bronchiolitis                           |
| H061500 | Acute bronchiolitis due to respiratory syncytial virus       |
| H061600 | Acute bronchiolitis due to other specified organisms         |
| H061z00 | Acute bronchiolitis NOS                                      |
| H062.00 | Acute lower respiratory tract infection                      |
| H06z.00 | Acute bronchitis or bronchiolitis NOS                        |
| H06z112 | Acute lower respiratory tract infection                      |
| H07..00 | Chest cold                                                   |
| H2...00 | Pneumonia and influenza                                      |
| H20..00 | Viral pneumonia                                              |
| H20..11 | Chest infection - viral pneumonia                            |
| H200.00 | Pneumonia due to adenovirus                                  |
| H201.00 | Pneumonia due to respiratory syncytial virus                 |
| H202.00 | Pneumonia due to parainfluenza virus                         |
| H20y.00 | Viral pneumonia NEC                                          |
| H20z.00 | Viral pneumonia NOS                                          |
| H21..00 | Lobar (pneumococcal) pneumonia                               |

|         |                                                       |
|---------|-------------------------------------------------------|
| H21..11 | Chest infection - pneumococcal pneumonia              |
| H22..00 | Other bacterial pneumonia                             |
| H22..11 | Chest infection - other bacterial pneumonia           |
| H220.00 | Pneumonia due to klebsiella pneumoniae                |
| H221.00 | Pneumonia due to pseudomonas                          |
| H222.00 | Pneumonia due to haemophilus influenzae               |
| H222.11 | Pneumonia due to haemophilus influenzae               |
| H223.00 | Pneumonia due to streptococcus                        |
| H223000 | Pneumonia due to streptococcus, group B               |
| H224.00 | Pneumonia due to staphylococcus                       |
| H22y.00 | Pneumonia due to other specified bacteria             |
| H22y000 | Pneumonia due to escherichia coli                     |
| H22y011 | E.coli pneumonia                                      |
| H22y100 | Pneumonia due to proteus                              |
| H22y200 | Pneumonia - Legionella                                |
| H22yX00 | Pneumonia due to other aerobic gram-negative bacteria |
| H22yz00 | Pneumonia due to bacteria NOS                         |
| H22z.00 | Bacterial pneumonia NOS                               |
| H23..00 | Pneumonia due to other specified organisms            |
| H23..11 | Chest infection - pneumonia organism OS               |
| H231.00 | Pneumonia due to mycoplasma pneumoniae                |
| H232.00 | Pneumonia due to pleuropneumonia like organisms       |
| H233.00 | Chlamydial pneumonia                                  |
| H23z.00 | Pneumonia due to specified organism NOS               |
| H24..00 | Pneumonia with infectious diseases EC                 |
| H240.00 | Pneumonia with measles                                |
| H241.00 | Pneumonia with cytomegalic inclusion disease          |
| H243.00 | Pneumonia with whooping cough                         |
| H243.11 | Pneumonia with pertussis                              |
| H24y.00 | Pneumonia with other infectious diseases EC           |
| H24y700 | Pneumonia with varicella                              |
| H24yz00 | Pneumonia with other infectious diseases EC NOS       |
| H24z.00 | Pneumonia with infectious diseases EC NOS             |
| H25..00 | Bronchopneumonia due to unspecified organism          |
| H25..11 | Chest infection - unspecified bronchopneumonia        |
| H26..00 | Pneumonia due to unspecified organism                 |
| H260.00 | Lobar pneumonia due to unspecified organism           |
| H261.00 | Basal pneumonia due to unspecified organism           |
| H263.00 | Pneumonitis, unspecified                              |
| H270.00 | Influenza with pneumonia                              |
| H270.11 | Chest infection - influenza with pneumonia            |
| H270000 | Influenza with bronchopneumonia                       |
| H270100 | Influenza with pneumonia, influenza virus identified  |
| H270z00 | Influenza with pneumonia NOS                          |
| H28..00 | Atypical pneumonia                                    |
| H2y..00 | Other specified pneumonia or influenza                |
| H2z..00 | Pneumonia or influenza NOS                            |
| H30..00 | Bronchitis unspecified                                |
| H30..11 | Chest infection - unspecified bronchitis              |
| H30..12 | Recurrent wheezy bronchitis                           |
| H300.00 | Tracheobronchitis NOS                                 |

|         |                                                          |
|---------|----------------------------------------------------------|
| H301.00 | Laryngotracheobronchitis                                 |
| H302.00 | Wheezy bronchitis                                        |
| H30z.00 | Bronchitis NOS                                           |
| H357.00 | Pneumonitis                                              |
| H501000 | Pleural abscess                                          |
| H501200 | Pleural empyema                                          |
| H501400 | Purulent pleurisy                                        |
| H51..00 | Pleurisy                                                 |
| H510.00 | Pleurisy without effusion or active tuberculosis         |
| H510300 | Acute dry pleurisy                                       |
| H510400 | Diaphragmatic pleurisy                                   |
| H510500 | Basal pleurisy                                           |
| H510900 | Pneumococcal pleurisy                                    |
| H510A00 | Staphylococcal pleurisy                                  |
| H510B00 | Streptococcal pleurisy                                   |
| H510z00 | Pleurisy without effusion or active tuberculosis NOS     |
| H511.00 | Bacterial pleurisy with effusion                         |
| H511000 | Pneumococcal pleurisy with effusion                      |
| H511100 | Staphylococcal pleurisy with effusion                    |
| H511z00 | Bacterial pleurisy with effusion NOS                     |
| H51y.00 | Other pleural effusion excluding mention of tuberculosis |
| H530300 | Abscess of lung with pneumonia                           |
| H564.00 | Bronchiolitis obliterans organising pneumonia            |
| H56y100 | Interstitial pneumonia                                   |
| Hyu0800 | [X]Other viral pneumonia                                 |
| Hyu0A00 | [X]Other bacterial pneumonia                             |
| Hyu0B00 | [X]Pneumonia due to other specified infectious organisms |
| Hyu0D00 | [X]Pneumonia in viral diseases classified elsewhere      |
| Hyu0H00 | [X]Other pneumonia, organism unspecified                 |
| Hyu1.00 | [X]Other acute lower respiratory infections              |
| Hyu1000 | [X]Acute bronchitis due to other specified organisms     |
| Hyu1100 | [X]Acute bronchiolitis due to other specified organisms  |
| R065400 | [D]Pleuritic pain                                        |
| R065500 | [D]Pleurodynia                                           |



Part 2: codes for asthma medication

| multilex | bnfcode                          | productname                                                                                              |
|----------|----------------------------------|----------------------------------------------------------------------------------------------------------|
| 0069001  | 03010200                         | ATROVENT aerosol inhaler 20micrograms/actuation [BOEH INGL]                                              |
| 0121001  | 03010103                         | BRICANYL aerosol inhaler [ASTRAZENECA]                                                                   |
| 0121002  | 03010103                         | BRICANYL TURBOHALER 500micrograms [ASTRAZENECA]                                                          |
| 0121003  | 03010103                         | BRICANYL spacer inhaler [ASTRAZENECA]                                                                    |
| 0122001  | 03010103                         | BRICANYL unit dose nebuliser solution 5mg/2ml [ASTRAZENECA]                                              |
| 0122002  | 03010103                         | BRICANYL respirator solution 10mg/ml [ASTRAZENECA]                                                       |
| 0281001  | 03010101<br>03010200<br>03010400 | DUOVENT aerosol inhaler 40micrograms + 100micrograms/actuation [BOEH INGL]                               |
| 0468001  | 03030100                         | INTAL SPINCAPS inhalation powder capsules [AVENTIS]                                                      |
| 0602009  | 03010103                         | SALBUTAMOL aerosol inhaler 100micrograms/inhalation [BERK]                                               |
| 0603009  | 03010103                         | SALBUTAMOL aerosol inhaler 100micrograms/inhalation [CP PHARM]                                           |
| 0605009  | 03010103                         | SALBUTAMOL aerosol inhaler 100micrograms/inhalation [CELLTECH]                                           |
| 0606009  | 03010103                         | SALBUTAMOL aerosol inhaler 100micrograms/inhalation [HILLCROSS]                                          |
| 0743001  | 03010101<br>03010200<br>03010400 | DUOVENT UDVs nebuliser solution [BOEH INGL]                                                              |
| 0745001  | 03010101<br>03010200<br>03010400 | ipratropium bromide with fenoterol hydrobromide unit dose nebulising solution 500micrograms + 1.25mg/4ml |
| 0833001  | 12020100                         | RYNACROM capsules (for inhalation) [RPR/FISONS]                                                          |
| 1020001  | 03010103                         | VENTOLIN aerosol inhaler 100micrograms/inhalation [GLAXO]                                                |
| 1020002  | 03010103                         | VENTOLIN ACCUHALER 200micrograms/actuation [GLAXO]                                                       |
| 1020003  | 03010103                         | VENTOLIN EVOHALER 100micrograms/inhalation [GLAXO]                                                       |
| 1021001  | 03010103                         | VENTOLIN ROTACAPS 200micrograms [A & H]                                                                  |
| 1021002  | 03010103                         | VENTOLIN ROTACAPS 400micrograms [A & H]                                                                  |
| 1023001  | 03010101                         | VENTOLIN respirator solution 5mg/ml [A & H]                                                              |
| 1024001  | 03010101                         | VENTOLIN NEBULES unit dose nebulising solution 2.5mg [A & H]                                             |
| 1024002  | 03010101                         | VENTOLIN NEBULES unit dose nebulising solution 5mg [A & H]                                               |
| 1193003  | 03010103                         | SALBULIN aerosol inhaler [3M]                                                                            |
| 1195001  | 03010103                         | SALAMOL aerosol inhaler 100micrograms/actuation [IVAX]                                                   |
| 1281001  | 03010102<br>03030100             | INTAL COMPOUND capsules (for inhalation) [RHONE]                                                         |
| 1340001  | 03010103                         | salbutamol capsules (for inhalation) 200micrograms                                                       |
| 1340002  | 03010103                         | salbutamol capsules (for inhalation) 400micrograms                                                       |
| 1340003  | 03010103                         | salbutamol CYCLOHALER                                                                                    |
| 1419001  | 03010101<br>03020000             | VENTIDE aerosol inhaler [A & H]                                                                          |
| 1561009  | 03010103                         | SALBUTAMOL aerosol inhaler 100micrograms/inhalation [IVAX]                                               |
| 1722001  | 03010200                         | ATROVENT UDVs nebuliser solution 0.25mg/ml [BOEH INGL]                                                   |
| 1776001  | 03030100                         | INTAL aerosol inhaler [AVENTIS]                                                                          |
| 1776002  | 03030100                         | INTAL AUTOHALER 5mg/inhalation [AVENTIS]                                                                 |
| 1776003  | 03030100                         | INTAL SYNCRONER 5mg/inhalation [AVENTIS]                                                                 |
| 2032009  | 03010103                         | SALBUTAMOL CYCLOCAPS 200micrograms [DU PONT]                                                             |
| 2032010  | 03010103                         | SALBUTAMOL CYCLOCAPS 400micrograms [DU PONT]                                                             |
| 2049001  | 03030100                         | INTAL nebuliser solution 10mg/ml [AVENTIS]                                                               |
| 2137001  | 03030100                         | STERI-NEB CROMOGEN nebuliser solution 10mg/ml [IVAX]                                                     |
| 2177009  | 03010200                         | IPRATROPIUM BROMIDE inhalation solution 250micrograms/ml [GALEN]                                         |

|         |          |                                                                                |
|---------|----------|--------------------------------------------------------------------------------|
| 2220001 | 03030100 | CROMOGEN aerosol inhaler 5mg/inhalation [IVAX]                                 |
| 2221001 | 03010101 | STERI-NEB SALAMOL unit dose nebulising solution 2.5mg/2.5ml [IVAX]             |
| 2221002 | 03010101 | STERI-NEB SALAMOL unit dose nebulising solution 5mg/2.5ml [IVAX]               |
| 2319001 | 03020000 | fluticasone unit dose nebulising suspension 2mg/2ml                            |
| 2319002 | 03020000 | fluticasone unit dose nebulising suspension 500micrograms/2ml                  |
| 2327001 | 03020000 | FLIXOTIDE NEBULES unit dose nebulising suspension 2mg/2ml [A & H]              |
| 2327002 | 03020000 | FLIXOTIDE NEBULES unit dose nebulising suspension 500micrograms/2ml [A & H]    |
| 2414001 | 03010103 | ASMAVEN aerosol inhaler 100micrograms [BERK]                                   |
| 2665001 | 03010200 | ATROVENT FORTE aerosol inhaler 40micrograms/actuation [BOEH INGL]              |
| 2757001 | 03010103 | BRICANYL refill canister [ASTRAZENEK]                                          |
| 2822009 | 03010103 | TERBUTALINE unit dose nebulising solution 2.5mg/ml [GALEN]                     |
| 2827001 | 03030100 | TILADE aerosol inhaler 2mg/inhalation [SANOFI/AVE]                             |
| 2827002 | 03030100 | TILADE mint inhaler 2mg/inhalation [SANOFI/AVE]                                |
| 2827003 | 03030100 | TILADE mint SYNCRONER 2mg/inhalation [SANOFI/AVE]                              |
| 2901009 | 03010101 | SALBUTAMOL unit dose nebulising solution 2.5mg/2.5ml [GALEN]                   |
| 2901010 | 03010101 | SALBUTAMOL unit dose nebulising solution 5mg/2.5ml [GALEN]                     |
| 2914001 | 03010103 | salbutamol aerosol inhaler 100micrograms/inhalation                            |
| 2914002 | 03010103 | salbutamol cfc free inhaler 100micrograms/inhalation                           |
| 3114009 | 03010200 | IPRATROPIUM BROMIDE unit dose nebulising solution 250micrograms/ml [HILLCROSS] |
| 3164009 | 03010103 | SALBUTAMOL aerosol inhaler 100micrograms/inhalation [GEN (UK)]                 |
| 3164011 | 03010101 | SALBUTAMOL unit dose nebulising solution 5mg/2.5ml [GEN (UK)]                  |
| 3263001 | 03030100 | sodium cromoglicate capsules (for inhalation) 20mg                             |
| 3264001 | 03010102 | sodium cromoglicate with isoprenaline capsules (for inhalation)                |
|         | 03030100 |                                                                                |
| 3265001 | 03030100 | sodium cromoglicate aerosol inhaler 1mg/inhalation                             |
| 3265002 | 03030100 | sodium cromoglicate inhaler and spacer 5mg/actuation                           |
| 3265003 | 03030100 | sodium cromoglicate nebuliser solution 10mg/ml                                 |
| 3266001 | 03030100 | sodium cromoglicate aerosol inhaler 5mg/inhalation                             |
| 3266002 | 03030100 | sodium cromoglicate breath actuated inhaler 5mg/inhalation                     |
| 3266003 | 03030100 | sodium cromoglicate inhaler and spacer 5mg/inhalation                          |
| 3268001 | 12020100 | sodium cromoglicate capsules (for inhalation)                                  |
| 3371009 | 03010103 | SALBUTAMOL cfc free inhaler 100micrograms/inhalation [APS]                     |
| 3435009 | 03010103 | SALBUTAMOL cfc free inhaler 100micrograms/inhalation [HILLCROSS]               |
| 3446001 | 03010101 | fenoterol with ipratropium bromide aerosol inhaler 100micrograms +             |
|         | 03010200 | 40micrograms/actuation                                                         |
|         | 03010400 |                                                                                |
| 3446002 | 03010101 | fenoterol with ipratropium bromide breath actuated inhaler 100micrograms +     |
|         | 03010200 | 40micrograms/actuation                                                         |
|         | 03010400 |                                                                                |
| 3574009 | 03010103 | SALBUTAMOL cfc free inhaler 100micrograms/inhalation [KENT]                    |
| 3834009 | 03010103 | SALBUTAMOL aerosol inhaler 100micrograms/inhalation [KENT]                     |
| 3886001 | 03010200 | ipratropium bromide aerosol inhaler 20micrograms/dose                          |
| 3886002 | 03010200 | ipratropium bromide breath actuated inhaler 20micrograms/dose                  |
| 3887001 | 03010200 | ipratropium bromide aerosol inhaler 40micrograms/metered inhalation            |
| 3888001 | 03010200 | ipratropium bromide nebuliser solution 0.25mg/ml                               |
| 3888002 | 03010200 | ipratropium bromide unit dose nebulising solution 250micrograms/ml             |
| 3888003 | 03010200 | ipratropium bromide inhalation solution 250micrograms/ml                       |
| 3889001 | 03010101 | ipratropium bromide with fenoterol hydrobromide aerosol inhaler 40micrograms   |
|         | 03010200 | + 100micrograms/actuation                                                      |
|         | 03010400 |                                                                                |

|         |                                  |                                                                                                                   |
|---------|----------------------------------|-------------------------------------------------------------------------------------------------------------------|
| 3889002 | 03010101<br>03010200<br>03010400 | ipratropium bromide with fenoterol hydrobromide breath actuated inhaler<br>40micrograms + 100micrograms/actuation |
| 3897009 | 03010103                         | SALBUTAMOL cfc free inhaler 100micrograms/inhalation [ACTAVIS]                                                    |
| 3973009 | 03010103                         | SALBUTAMOL CYCLOCAPS capsules (for inhalation) 200micrograms [TEVA]                                               |
| 3974009 | 03010103                         | SALBUTAMOL CYCLOCAPS capsules (for inhalation) 400micrograms [TEVA]                                               |
| 4016001 | 03010101<br>03020000             | beclometasone with salbutamol aerosol inhaler 50micrograms +<br>100micrograms/inhalation                          |
| 4016002 | 03010101<br>03020000             | beclometasone with salbutamol capsules (for inhalation) 200micrograms +<br>400micrograms                          |
| 4016003 | 03010101<br>03020000             | beclometasone with salbutamol capsules (for inhalation) 100micrograms +<br>200micrograms                          |
| 4249001 | 03030100                         | nedocromil sodium aerosol inhaler 2mg/inhalation                                                                  |
| 4785001 | 03010103                         | terbutaline aerosol inhaler 250micrograms/actuation                                                               |
| 4785002 | 03010103                         | terbutaline spacer inhaler 250micrograms/actuation                                                                |
| 4785003 | 03010103                         | terbutaline refill canister 250micrograms/actuation                                                               |
| 4786001 | 03010103                         | terbutaline unit dose nebuliser solution 5mg/2ml                                                                  |
| 4786002 | 03010103                         | terbutaline respirator solution 10mg/ml                                                                           |
| 5055001 | 03010101                         | salbutamol unit dose nebulising solution 2.5mg/2.5ml                                                              |
| 5055002 | 03010101                         | salbutamol unit dose nebulising solution 5mg/2.5ml                                                                |
| 5056001 | 03010103                         | salbutamol capsules (for inhalation) 200micrograms                                                                |
| 5056002 | 03010103                         | salbutamol capsules (for inhalation) 400micrograms                                                                |
| 5056003 | 03010101                         | salbutamol respirator solution 5mg/ml                                                                             |
| 5058001 | 03010101<br>03020000             | salbutamol with beclometasone aerosol inhaler 100mcg + 50mcg                                                      |
| 5058002 | 03010101<br>03020000             | salbutamol with beclometasone capsules (for inhalation) 400micrograms +<br>200micrograms                          |
| 5058003 | 03010101<br>03020000             | salbutamol with beclometasone capsules (for inhalation) 200micrograms +<br>100micrograms                          |
| 5137001 | 03010103                         | AEROLIN 400 aerosol inhaler 100micrograms/actuation [3M]                                                          |
| 5138001 | 03010103                         | AEROLIN AUTOHALER breath actuated inhaler 100micrograms/actuation [3M]                                            |
| 5138002 | 03010103                         | AEROLIN AUTOHALER cfc free breath actuated inhaler 100micrograms/actuation<br>[3M]                                |
| 5150001 | 03010101<br>03020000             | VENTIDE ROTACAPS [A & H]                                                                                          |
| 5150002 | 03010101<br>03020000             | VENTIDE paediatric ROTACAPS [A & H]                                                                               |
| 5153001 | 03010103                         | VENTODISKS disc 200micrograms/blister [A & H]                                                                     |
| 5153002 | 03010103                         | VENTODISKS disc 400micrograms/blister [A & H]                                                                     |
| 5374001 | 03020000<br>03010104             | SERETIDE 250 EVOHALER cfc free inhaler [A & H]                                                                    |
| 5411009 | 03010200                         | IPRATROPIUM BROMIDE unit dose nebuliser solution 250micrograms/ml [GALEN]                                         |
| 5470001 | 03010103                         | SALBUVENT aerosol inhaler 100micrograms/actuation [PHARMACIA]                                                     |
| 5544001 | 03010103                         | salbutamol disc 200micrograms                                                                                     |
| 5544002 | 03010103                         | salbutamol disc 400micrograms                                                                                     |
| 5616001 | 03010103                         | salbutamol breath actuated inhaler 100micrograms/actuation                                                        |
| 5616002 | 03010103                         | salbutamol dry powder inhaler 200micrograms/actuation                                                             |
| 5616003 | 03010103                         | salbutamol dry powder inhaler 95micrograms                                                                        |
| 5740001 | 03010101                         | SALBUVENT respirator solution 5mg/ml [PHARMACIA]                                                                  |
| 5800001 | 03010103                         | MAXIVENT aerosol inhaler 100micrograms/inhalation [ASHBOURNE]                                                     |
| 6016001 | 03020000<br>03010104             | fluticasone with salmeterol cfc free inhaler 50micrograms +<br>25micrograms/actuation                             |

|         |          |                                                                               |
|---------|----------|-------------------------------------------------------------------------------|
| 6016002 | 03020000 | fluticasone with salmeterol cfc free inhaler 125micrograms +                  |
|         | 03010104 | 25micrograms/actuation                                                        |
| 6016003 | 03020000 | fluticasone with salmeterol cfc free inhaler 250micrograms +                  |
|         | 03010104 | 25micrograms/actuation                                                        |
| 6267001 | 03010101 | sodium cromoglicate with salbutamol aerosol inhaler                           |
|         | 03010400 |                                                                               |
|         | 03030100 |                                                                               |
| 6267002 | 03010101 | sodium cromoglicate with salbutamol inhaler and spacer                        |
|         | 03010400 |                                                                               |
|         | 03030100 |                                                                               |
| 6268001 | 03010101 | AEROCROM aerosol inhaler [CASTLEMEAD]                                         |
|         | 03010400 |                                                                               |
|         | 03030100 |                                                                               |
| 6268002 | 03010101 | AEROCROM SYNCRONER [CASTLEMEAD]                                               |
|         | 03010400 |                                                                               |
|         | 03030100 |                                                                               |
| 6314001 | 03010200 | ipratropium bromide capsules for inhalation + inhaler 40mcg                   |
| 6314002 | 03010200 | ipratropium bromide capsules (for inhalation) 40mcg                           |
| 6315001 | 03010200 | ATROVENT AEROHALER 40mcg [BOEH INGL]                                          |
| 6315002 | 03010200 | ATROVENT AEROCAPS 40mcg [BOEH INGL]                                           |
| 6698009 | 03010101 | SALBUTAMOL unit dose nebulising solution 2.5mg/2.5ml [HILLCROSS]              |
| 6817001 | 03010104 | salmeterol aerosol inhaler 25micrograms/actuation                             |
| 6817002 | 03010104 | salmeterol disc 50micrograms                                                  |
| 6817003 | 03010104 | salmeterol dry powder inhaler 50micrograms/actuation                          |
| 6818001 | 03010104 | SEREVENT aerosol inhaler 25micrograms/actuation [GLAXO]                       |
| 6818002 | 03010104 | SEREVENT DISKHALER 50micrograms [GLAXO]                                       |
| 6818003 | 03010104 | SEREVENT ACCUHALER 50micrograms/actuation [GLAXO]                             |
| 6845001 | 03010103 | terbutaline dry powder inhaler 500micrograms                                  |
| 6934001 | 03030100 | INTAL FISONAIR aerosol inhaler 5mg/inhalation [AVENTIS]                       |
| 6942001 | 03020000 | FLIXOTIDE disc 50micrograms [A & H]                                           |
| 6942002 | 03020000 | FLIXOTIDE disc 100micrograms [A & H]                                          |
| 6942003 | 03020000 | FLIXOTIDE disc 250micrograms [A & H]                                          |
| 6943001 | 03020000 | fluticasone disc 50micrograms                                                 |
| 6943002 | 03020000 | fluticasone disc 100micrograms                                                |
| 6943003 | 03020000 | fluticasone disc 250micrograms                                                |
| 7099001 | 03020000 | FLIXOTIDE aerosol inhaler 25micrograms/actuation [A & H]                      |
| 7099002 | 03020000 | FLIXOTIDE aerosol inhaler 50micrograms/actuation [A & H]                      |
| 7099003 | 03020000 | FLIXOTIDE aerosol inhaler 125micrograms/actuation [A & H]                     |
| 7100001 | 03020000 | fluticasone aerosol inhaler 25micrograms/actuation                            |
| 7100002 | 03020000 | fluticasone aerosol inhaler 50micrograms/actuation                            |
| 7100003 | 03020000 | fluticasone aerosol inhaler 125micrograms/actuation                           |
| 7104001 | 03010200 | ATROVENT AUTOHALER breath actuated inhaler 20micrograms/actuation [BOEH INGL] |
| 7105001 | 03010101 | DUOVENT AUTOHALER breath actuated inhaler [BOEH INGL]                         |
|         | 03010200 |                                                                               |
|         | 03010400 |                                                                               |
| 7154001 | 03020000 | fluticasone aerosol inhaler 250micrograms/actuation                           |
| 7154002 | 03020000 | fluticasone dry powder inhaler 50micrograms/inhalation                        |
| 7154003 | 03020000 | fluticasone dry powder inhaler 100micrograms/inhalation                       |
| 7155001 | 03020000 | fluticasone disc 500micrograms                                                |
| 7156001 | 03020000 | FLIXOTIDE disc 500micrograms [A & H]                                          |

|         |          |                                                                                      |
|---------|----------|--------------------------------------------------------------------------------------|
| 7157001 | 03020000 | FLIXOTIDE aerosol inhaler 250micrograms/actuation [A & H]                            |
| 7157002 | 03020000 | FLIXOTIDE ACCUHALER 50micrograms/inhalation [A & H]                                  |
| 7157003 | 03020000 | FLIXOTIDE ACCUHALER 100micrograms/inhalation [A & H]                                 |
| 7243001 | 03010101 | COMBIVENT aerosol inhaler 20mcg + 100mcg [BOEH INGL]                                 |
|         | 03010200 |                                                                                      |
|         | 03010400 |                                                                                      |
| 7244001 | 03010101 | ipratropium bromide with salbutamol aerosol inhaler 20mcg + 100mcg                   |
|         | 03010200 |                                                                                      |
|         | 03010400 |                                                                                      |
| 7334001 | 03010200 | STERI-NEB IPRATROPIUM unit dose nebulising solution 250micrograms/ml [IVAX]          |
| 7526001 | 03020000 | fluticasone cfc free inhaler 125micrograms/actuation                                 |
| 7526002 | 03020000 | fluticasone cfc free inhaler 250micrograms/actuation                                 |
| 7526003 | 03020000 | fluticasone cfc free inhaler 50micrograms/actuation                                  |
| 7588001 | 03020000 | budesonide with formoterol dry powder inhaler 400micrograms +                        |
|         | 03010104 | 12micrograms/actuation                                                               |
| 7800001 | 03020000 | SERETIDE 500 ACCUHALER dry powder inhaler [GLAXO]                                    |
|         | 03010104 |                                                                                      |
| 7949009 | 03010103 | SALBUTAMOL cfc free inhaler 100micrograms/inhalation [NEOLAB]                        |
| 8380001 | 03020000 | FLIXOTIDE EVOHALER cfc free inhaler 125micrograms/actuation [A & H]                  |
| 8380002 | 03020000 | FLIXOTIDE EVOHALER cfc free inhaler 250micrograms/actuation [A & H]                  |
| 8380003 | 03020000 | FLIXOTIDE EVOHALER cfc free inhaler 50micrograms/actuation [A & H]                   |
| 8429001 | 03010101 | MAXIVENT STERIPOULE unit dose nebulising solution 2.5mg/2.5ml [ASHBOURNE]            |
| 8429002 | 03010101 | MAXIVENT STERIPOULE unit dose nebulising solution 5mg/2.5ml [ASHBOURNE]              |
| 8452001 | 03020000 | SERETIDE 125 EVOHALER cfc free inhaler [A & H]                                       |
|         | 03010104 |                                                                                      |
| 8506001 | 03020000 | SYMBICORT TURBOHALER dry powder inhaler 400micrograms +                              |
|         | 03010104 | 12micrograms/actuation [ASTRAZENECA]                                                 |
| 8602001 | 03010103 | AIROMIR cfc free inhaler 100micrograms/inhalation [TEVA]                             |
| 8651001 | 03020000 | SERETIDE 250 ACCUHALER dry powder inhaler [GLAXO]                                    |
|         | 03010104 |                                                                                      |
| 8654001 | 03010103 | SALAMOL cfc free inhaler 100micrograms/inhalation [KENT]                             |
| 8664001 | 03010103 | AIROMIR AUTOHALER cfc free breath actuated inhaler 100micrograms/actuation [IVAX]    |
| 8665001 | 03020000 | FLIXOTIDE ACCUHALER 250micrograms/inhalation [A & H]                                 |
| 8665002 | 03020000 | FLIXOTIDE ACCUHALER 500micrograms/inhalation [A & H]                                 |
| 8677001 | 03020000 | fluticasone dry powder inhaler 250micrograms/inhalation                              |
| 8677002 | 03020000 | fluticasone dry powder inhaler 500micrograms/inhalation                              |
| 8679001 | 03010101 | SALAMOL STERI-NEB unit dose nebulising solution 2.5mg/2.5ml [NUMARK]                 |
| 8688001 | 03010101 | COMBIVENT UDV's nebuliser solution 2.5ml [BOEH INGL]                                 |
|         | 03010200 |                                                                                      |
|         | 03010400 |                                                                                      |
| 8689001 | 03010101 | ipratropium bromide with salbutamol unit dose nebulising solution                    |
|         | 03010200 | 500micrograms + 2.5mg/2.5ml                                                          |
|         | 03010400 |                                                                                      |
| 8715001 | 03010103 | SALAMOL EASI-BREATHE breath actuated inhaler 100micrograms/actuation [IVAX]          |
| 8715002 | 03010103 | SALAMOL EASI-BREATHE cfc free breath actuated inhaler 100micrograms/actuation [IVAX] |
| 8727001 | 03010103 | salbutamol breath actuated inhaler 100micrograms/actuation                           |
| 8892001 | 03010101 | salbutamol with ipratropium bromide unit dose nebulising solution 2.5mg +            |
|         | 03010200 | 500micrograms/2.5ml                                                                  |
|         | 03010400 |                                                                                      |

|          |                                  |                                                                                             |
|----------|----------------------------------|---------------------------------------------------------------------------------------------|
| 8921001  | 03010101<br>03010200<br>03010400 | fenoterol with ipratropium bromide unit dose nebulising solution 1.25mg + 500micrograms/4ml |
| 9056001  | 03010104                         | FORADIL capsules (for inhalation) 12mcg [NOV/CIBA]                                          |
| 9057001  | 03010104                         | formoterol fumarate capsules (for inhalation) 12mcg                                         |
| 9319001  | 03010101<br>03010200<br>03010400 | salbutamol with ipratropium bromide aerosol inhaler 100micrograms + 20micrograms/actuation  |
| 9412001  | 03010103                         | SALAMOL cfc free inhaler 100micrograms/inhalation [IVAX]                                    |
| 9580001  | 03010103                         | salbutamol vortex metered dose inhaler 100micrograms/inhalation                             |
| 9581001  | 03010103                         | SALBUTAMOL SPACEHALER 100micrograms/inhalation [CELLTECH]                                   |
| 9605001  | 03020000<br>03010104             | SYMBICORT TURBOHALER dry powder inhaler 100micrograms + 6micrograms/actuation [ASTRAZENECA] |
| 9605002  | 03020000<br>03010104             | SYMBICORT TURBOHALER dry powder inhaler 200micrograms + 6micrograms/actuation [ASTRAZENECA] |
| 10652001 | 03010103                         | PULVINAL SALBUTAMOL dry powder inhaler 200micrograms/actuation [CHIESI]                     |
| 10713001 | 03030100                         | CROMOGEN EASI-BREATHE breath actuated inhaler 5mg/inhalation [IVAX]                         |
| 10724001 | 03010103                         | SPACEHALER SALBUTAMOL SPACEHALER 100micrograms/inhalation [CELLTECH]                        |
| 10821001 | 03010101                         | SALAMOL STERI-NEB unit dose nebulising solution 5mg/2.5ml [NUMARK]                          |
| 10939001 | 03010103                         | SALBULIN cfc free inhaler 100micrograms/actuation [3M]                                      |
| 11165001 | 03010103                         | VENTOLIN EASI-BREATHE breath actuated inhaler 100micrograms/actuation [A & H]               |
| 11474001 | 03020000<br>03010104             | salmeterol with fluticasone dry powder inhaler 50micrograms + 100micrograms/inhalation      |
| 11474002 | 03020000<br>03010104             | salmeterol with fluticasone dry powder inhaler 50micrograms + 250micrograms/inhalation      |
| 11474003 | 03020000<br>03010104             | salmeterol with fluticasone dry powder inhaler 50micrograms+ 500micrograms/inhalation       |
| 11475001 | 03020000<br>03010104             | fluticasone with salmeterol dry powder inhaler 100micrograms + 50micrograms/inhalation      |
| 11475002 | 03020000<br>03010104             | fluticasone with salmeterol dry powder inhaler 250micrograms + 50micrograms/inhalation      |
| 11475003 | 03020000<br>03010104             | fluticasone with salmeterol dry powder inhaler 500micrograms + 50micrograms/inhalation      |
| 11477001 | 03020000<br>03010104             | SERETIDE 100 ACCUHALER dry powder inhaler [GLAXO]                                           |
| 11509001 | 03010104                         | formoterol fumarate dry powder inhaler 6 micrograms/actuation                               |
| 11509002 | 03010104                         | formoterol fumarate dry powder inhaler 12micrograms/actuation                               |
| 11511001 | 03010104                         | OXIS 6 TURBOHALER dry powder inhaler 6 micrograms/actuation [ASTRAZENECA]                   |
| 11512001 | 03010104                         | OXIS 12 TURBOHALER dry powder inhaler 12micrograms/actuation [ASTRAZENECA]                  |
| 11529001 | 03010103                         | ASMASAL SPACEHALER 100micrograms/inhalation [CELLTECH]                                      |
| 11642001 | 03010103                         | ASMASAL CLICKHALER dry powder inhaler 95micrograms [FOCUS]                                  |
| 11647001 | 03030200                         | SINGULAIR PAEDIATRIC chewable tablet 5mg [M S D]                                            |
| 11647002 | 03030200                         | SINGULAIR PAEDIATRIC chewable tablet 4mg [M S D]                                            |
| 11648001 | 03030200                         | montelukast (as sodium salt) chewable tablet 5mg                                            |
| 11648002 | 03030200                         | montelukast (as sodium salt) tablets 10mg                                                   |
| 11648003 | 03030200                         | montelukast (as sodium salt) chewable tablet 4mg                                            |
| 11657001 | 03030200                         | SINGULAIR tablets 10mg [M S D]                                                              |
| 11694001 | 03020000<br>03010104             | budesonide with formoterol dry powder inhaler 100micrograms + 6micrograms/actuation         |
| 11694002 | 03020000                         | budesonide with formoterol dry powder inhaler 200micrograms +                               |

|          |          |                                                                                  |
|----------|----------|----------------------------------------------------------------------------------|
|          | 03010104 | 6micrograms/actuation                                                            |
| 11700001 | 03010200 | RESPONTIN NEBULES unit dose nebulising solution 250micrograms/ml [GLAXO]         |
| 11726001 | 03010200 | TROPIOVENT STERIPOULE unit dose nebulising solution 250micrograms/ml [ASHBOURNE] |
| 11737001 | 03010103 | SALAMOL cfc free inhaler 100micrograms/inhalation [SANDOZ]                       |
| 11897001 | 03030200 | zafirlukast tablets 20mg                                                         |
| 11904001 | 03030200 | ACCOLATE tablets 20mg [ASTRAZENECA]                                              |
| 11995001 | 03010103 | salbutamol cfc free breath actuated inhaler 100micrograms/actuation              |
| 12019001 | 03020000 | salmeterol with fluticasone cfc free inhaler 25micrograms +                      |
|          | 03010104 | 50micrograms/actuation                                                           |
| 12019002 | 03020000 | salmeterol with fluticasone cfc free inhaler 25micrograms +                      |
|          | 03010104 | 125micrograms/actuation                                                          |
| 12019003 | 03020000 | salmeterol with fluticasone cfc free inhaler 25micrograms +                      |
|          | 03010104 | 250micrograms/actuation                                                          |
| 12020001 | 03020000 | SERETIDE 50 EVOHALER cfc free inhaler [A & H]                                    |
|          | 03010104 |                                                                                  |
| 12398001 | 03030200 | montelukast (as sodium salt) granules 4mg/sachet                                 |
| 12402001 | 03030200 | SINGULAIR PAEDIATRIC granules 4mg/sachet [M S D]                                 |
| 12485001 | 03010200 | ipratropium bromide cfc free inhaler 20micrograms/actuation                      |
| 12486001 | 03010200 | ATROVENT cfc free inhaler 20micrograms/actuation [BOEH INGL]                     |
| 12722001 | 03010103 | salbutamol dry powder inhaler 100micrograms/actuation                            |
| 12723001 | 03010103 | EASYHALER SALBUTAMOL dry powder inhaler 100micrograms/actuation [ORION]          |
| 12724001 | 03010103 | EASYHALER SALBUTAMOL dry powder inhaler 200micrograms/actuation [ORION]          |
| 12871001 | 03010200 | ipratropium bromide unit dose nebuliser solution 250micrograms/ml                |
| 12872001 | 03010200 | ipratropium bromide unit dose nebuliser solution 500micrograms/2ml               |
| 12873001 | 03010200 | ATROVENT UDV's nebuliser solution 250micrograms/1ml [BOEH INGL]                  |
| 12874001 | 03010200 | ATROVENT UDV's nebuliser solution 500micrograms/2ml [BOEH INGL]                  |
| 12890001 | 03010200 | RESPONTIN NEBULES unit dose nebulising solution 250micrograms/ml [GLAXO]         |
| 12891001 | 03010200 | RESPONTIN NEBULES unit dose nebulising solution 500micrograms/2ml [GLAXO]        |
| 12892001 | 03010200 | STERI-NEB IPRATROPIUM unit dose nebulising solution 250micrograms/ml [IVAX]      |
| 12894001 | 03010200 | STERI-NEB IPRATROPIUM unit dose nebulising solution 500micrograms/2ml [IVAX]     |
|          | 03010104 | formoterol fumarate cfc free inhaler 12micrograms/actuation                      |
| 13469001 | 03010104 | ATIMOS MODULITE cfc free inhaler 12micrograms/actuation [CHIESI]                 |
| 13502001 | 03030100 | nedocromil sodium cfc free inhaler 2mg/inhalation                                |
| 13503001 | 03030100 | TILADE cfc free inhaler 2mg/inhalation [SANOFI/AVE]                              |
| 13678001 | 03010104 | salmeterol cfc free inhaler 25micrograms/actuation                               |
| 13679001 | 03010104 | SEREVENT EVOHALER cfc free inhaler 25micrograms/actuation [GLAXO]                |
| 14551001 | 03010101 | IPRAMOL STERI-NEB unit dose nebulising solution 500micrograms + 2.5mg/2.5ml      |
|          | 03010200 | [IVAX]                                                                           |
|          | 03010400 |                                                                                  |
| 15010001 | 03010104 | EASYHALER FORMOTEROL dry powder inhaler 12micrograms/actuation [ORION]           |
| 15084001 | 03010104 | salmeterol inhalation powder blisters with device 50micrograms                   |
| 15087001 | 03010104 | salmeterol inhalation powder blisters (refill) 50micrograms                      |
| 15088001 | 03010104 | SEREVENT DISKHALER inhalation powder 50micrograms [GLAXO]                        |
| 15091001 | 03010104 | SEREVENT DISKHALER (REFILL) inhalation powder 50micrograms [GLAXO]               |
| 15228001 | 03020000 | fluticasone inhalation powder blisters with device 50micrograms                  |
| 15229001 | 03020000 | fluticasone inhalation powder blisters (refill) 50micrograms                     |
| 15231001 | 03020000 | FLIXOTIDE DISKHALER inhalation powder 50micrograms [A & H]                       |
| 15232001 | 03020000 | FLIXOTIDE DISKHALER (REFILL) inhalation powder 50micrograms [A & H]              |
| 15236001 | 03020000 | fluticasone inhalation powder blisters with device 100micrograms                 |

|          |          |                                                                                 |
|----------|----------|---------------------------------------------------------------------------------|
| 15237001 | 03020000 | fluticasone inhalation powder blisters (refill) 100micrograms                   |
| 15239001 | 03020000 | FLIXOTIDE DISKHALER inhalation powder 100micrograms [A & H]                     |
| 15240001 | 03020000 | FLIXOTIDE DISKHALER (REFILL) inhalation powder 100micrograms [A & H]            |
| 15242001 | 03020000 | fluticasone inhalation powder blisters with device 250micrograms                |
| 15243001 | 03020000 | fluticasone inhalation powder blisters (refill) 250micrograms                   |
| 15244001 | 03020000 | FLIXOTIDE DISKHALER inhalation powder 250micrograms [A & H]                     |
| 15245001 | 03020000 | FLIXOTIDE DISKHALER (REFILL) inhalation powder 250micrograms [A & H]            |
| 15246001 | 03020000 | fluticasone inhalation powder blisters with device 500 micrograms               |
| 15247001 | 03020000 | fluticasone inhalation powder blisters (refill) 500 micrograms                  |
| 15248001 | 03020000 | FLIXOTIDE DISKHALER inhalation powder 500 micrograms [A & H]                    |
| 15249001 | 03020000 | FLIXOTIDE DISKHALER (REFILL) inhalation powder 500 micrograms [A & H]           |
| 15760001 | 03020000 | beclometasone extrafine particle with formoterol cfc free inhaler 100micrograms |
|          | 03010104 | + 6micrograms/actuation                                                         |
| 15761001 | 03020000 | FOSTAIR cfc free inhaler 100micrograms + 6micrograms/actuation [CHIESI]         |
|          | 03010104 |                                                                                 |
| 16041001 | 03010103 | salbutamol dry powder inhalation cartridge with device 100micrograms            |
| 16042001 | 03010103 | salbutamol dry powder inhalation cartridge (refill) 100micrograms               |
| 16043001 | 03010103 | SALBULIN MDPI NOVOLIZER dry powder inhalation cartridge with device             |
|          |          | 100micrograms [MEDA]                                                            |
| 16044001 | 03010103 | SALBULIN MDPI NOVOLIZER dry powder inhalation cartridge (refill)                |
|          |          | 100micrograms [MEDA]                                                            |
| 16313001 | 03030100 | sodium cromoglicate cfc free inhaler 5mg                                        |
| 16320001 | 03030100 | INTAL cfc free inhaler 5mg [SANOFI/AVE]                                         |
| 16659001 | 03010200 | STERIPOULE IPRATROPIUM unit dose nebuliser solution 250micrograms/ml            |
|          |          | [GALEN]                                                                         |
| 16663001 | 03010200 | STERIPOULE IPRATROPIUM unit dose nebuliser solution 500micrograms/2ml           |
|          |          | [GALEN]                                                                         |
| 16667001 | 03010101 | STERIPOULE SALBUTAMOL unit dose nebuliser solution 2.5mg/2.5ml [GALEN]          |
| 16669001 | 03010101 | STERIPOULE SALBUTAMOL unit dose nebuliser solution 5mg/2.5ml [GALEN]            |
| 17182001 | 03010101 | SALIPRANEB unit dose nebulising solution 500micrograms + 2.5mg/2.5ml            |
|          | 03010200 | [BREATH]                                                                        |
|          | 03010400 |                                                                                 |
| 17736001 | 03010200 | ATROVENT AEROHALER inhalation powder capsules with device 40mcg [BOEH           |
|          |          | INGL]                                                                           |
| 17737001 | 03010200 | ATROVENT AEROCAPS inhalation powder capsules 40mcg [BOEH INGL]                  |
| 17738001 | 03010103 | BRICANYL TURBOHALER dry powder inhaler 500micrograms [ASTRAZENECA]              |
| 17739001 | 03010103 | VENTOLIN EVOHALER cfc free inhaler 100micrograms/inhalation [GLAXO]             |
| 17740001 | 03010103 | VENTOLIN ACCUHALER dry powder inhaler 200micrograms/actuation [GLAXO]           |
| 17741001 | 03020000 | FLIXOTIDE ACCUHALER dry powder inhaler 50micrograms/inhalation [A & H]          |
| 17742001 | 03020000 | FLIXOTIDE ACCUHALER dry powder inhaler 100micrograms/inhalation [A & H]         |
| 17744001 | 03020000 | FLIXOTIDE ACCUHALER dry powder inhaler 250micrograms/inhalation [A & H]         |
| 17745001 | 03020000 | FLIXOTIDE ACCUHALER dry powder inhaler 500micrograms/inhalation [A & H]         |
| 17804001 | 03010103 | BRICANYL RESPULES unit dose nebuliser solution 5mg/2ml [ASTRAZENECA]            |
